# Supplementary material for: Aberrant expression and constitutive activation of STAT3 in cervical carcinogenesis: implications in high-risk human papillomavirus infection
Source: Springer Nature journal article supplement (doi:10.1186/1476-4598-9-282), 2010-10-27

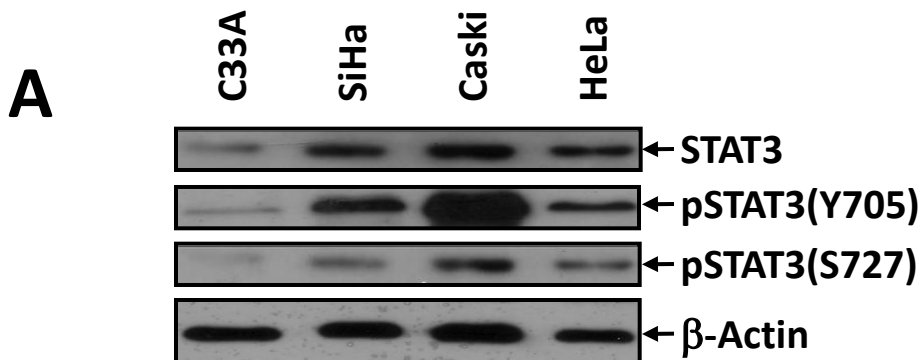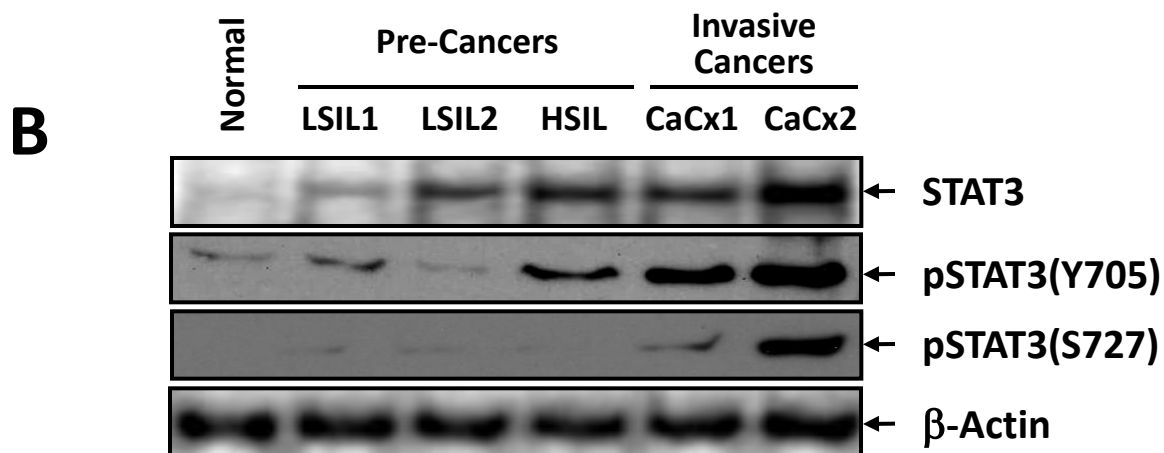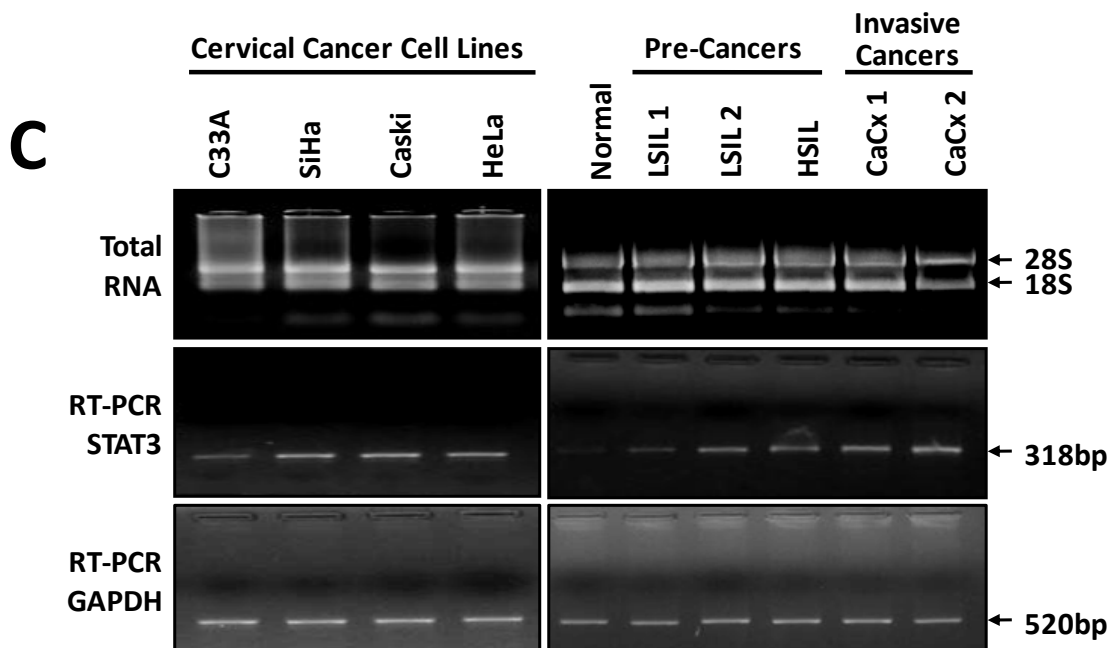

Supplement: 12943_2010_796_MOESM3_ESM.pdf [file 12943_2010_796_MOESM3_ESM.pdf]
