# Supplementary material for: Aberrant expression and constitutive activation of STAT3 in cervical carcinogenesis: implications in high-risk human papillomavirus infection
Source: Springer Nature journal article supplement (doi:10.1186/1476-4598-9-282), 2010-10-27
Supplement: 12943_2010_796_MOESM7_ESM.pdf [file 12943_2010_796_MOESM7_ESM.pdf]

**A**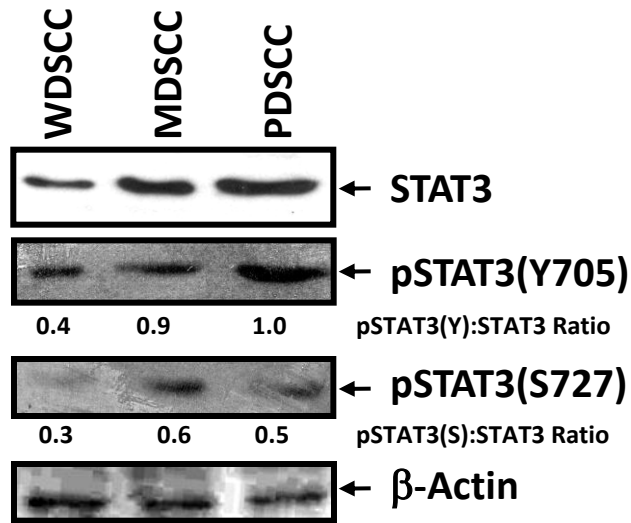**B**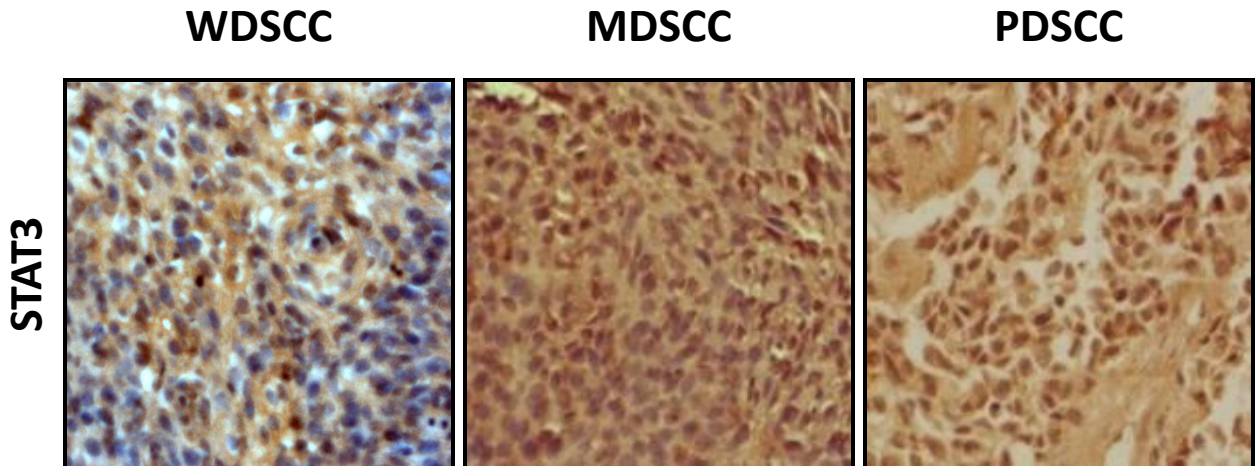**C**

|                                                                   | WDSCC<br>(n = 22) | MDSCC<br>(n = 17)        | PDSCC<br>(n = 6)          |
|-------------------------------------------------------------------|-------------------|--------------------------|---------------------------|
| <b>STAT3 over-expression<sup>1</sup></b>                          | 45% (10/22)       | 77% <sup>a</sup> (13/17) | 100% <sup>a,b</sup> (6/6) |
| <b>% Nuclear positivity<sup>2</sup><br/>(<math>\pm</math> SD)</b> | 53 $\pm$ 6        | 78 $\pm$ 4 <sup>c</sup>  | 88 $\pm$ 3 <sup>c,d</sup> |
